# Supplementary material for: Effect of Radiological Countermeasures on Subjective Well-Being and Radiation Anxiety after the 2011 Disaster: The Fukushima Health Management Survey
Source: MDPI journal article supplement (doi:10.3390/ijerph15010124), 2018-01-12
Supplement: s1 [file s1]

**Table S1.** Arithmetic mean, standard deviation (SD) and distributions of radiation risk perceptions.

|                       | Arithmetic mean | SD   | Distributions |     |     |     |
|-----------------------|-----------------|------|---------------|-----|-----|-----|
|                       |                 |      | 1             | 2   | 3   | 4   |
| Dread [1-4]           | 3.03            | 0.76 | 3%            | 18% | 52% | 27% |
| Unknown [1-4]         | 2.66            | 0.78 | 7%            | 32% | 49% | 12% |
| Delayed effects [1-4] | 2.67            | 0.81 | 7%            | 33% | 45% | 15% |
| Genetic effects [1-4] | 2.69            | 0.85 | 8%            | 33% | 42% | 18% |

**Table S2.** Distributions of risk acceptance.

|                       | Distributions |
|-----------------------|---------------|
| Never mind            | 19%           |
| Acceptable            | 16%           |
| Can't help but accept | 17%           |
| Unacceptable          | 16%           |
| Can't judge           | 31%           |

**Table S3.** Distributions of evaluation for each radiological countermeasure.

|                                  | Very useful | Useful | Neither | Not useful | Not useful at all | Don't know |
|----------------------------------|-------------|--------|---------|------------|-------------------|------------|
| WBC                              | 10%         | 44%    | 25%     | 10%        | 5%                | 6%         |
| Food inspection                  | 21%         | 47%    | 18%     | 7%         | 4%                | 3%         |
| Air dose monitoring              | 16%         | 46%    | 20%     | 9%         | 6%                | 4%         |
| Individual dose monitoring       | 7%          | 34%    | 33%     | 12%        | 7%                | 6%         |
| Basic survey                     | 7%          | 31%    | 34%     | 13%        | 10%               | 6%         |
| Thyroid examination              | 12%         | 41%    | 29%     | 8%         | 6%                | 5%         |
| Thyroid examination <sup>a</sup> | 17%         | 47%    | 23%     | 8%         | 4%                | 2%         |
| Explanatory meeting              | 6%          | 33%    | 36%     | 10%        | 8%                | 7%         |

WBC: whole body counter.

a: Respondents or their family members are subjects of examination.

**Table S4.** Basic characteristics of respondents.

|                                     |                                                                         | N (%)     |
|-------------------------------------|-------------------------------------------------------------------------|-----------|
| Age                                 | 20s                                                                     | 137 (13%) |
|                                     | 30s                                                                     | 260 (25%) |
|                                     | 40s                                                                     | 291 (28%) |
|                                     | 50s                                                                     | 203 (20%) |
|                                     | 60s                                                                     | 132 (13%) |
| Gender                              | Men                                                                     | 488 (48%) |
|                                     | Women                                                                   | 535 (52%) |
| Employment status                   | Company employees etc. <sup>a</sup>                                     | 499 (49%) |
|                                     | Self-employed                                                           | 78 (8%)   |
|                                     | Other <sup>b</sup>                                                      | 446 (44%) |
| Location                            | Hamadori                                                                | 228 (22%) |
|                                     | Nakadori                                                                | 663 (65%) |
|                                     | Aizu                                                                    | 132 (13%) |
| Evacuation                          | Presence of evacuation experience                                       | 210 (21%) |
|                                     | Absence of evacuation experience                                        | 813 (79%) |
| Spouse                              | Presence of spouse                                                      | 664 (65%) |
|                                     | Absence of spouse                                                       | 359 (35%) |
| Children                            | Presence of children                                                    | 619 (61%) |
|                                     | Absence of children                                                     | 404 (39%) |
| Grandchildren                       | Presence of grandchildren                                               | 92 (9%)   |
|                                     | Absence of grandchildren                                                | 931 (91%) |
| Educational background              | Junior or high-school graduates                                         | 473 (46%) |
|                                     | University graduates etc.                                               | 550 (54%) |
| Educational course                  | Science course <sup>c</sup>                                             | 308 (30%) |
|                                     | Neither                                                                 | 240 (23%) |
|                                     | Humanities course <sup>d</sup>                                          | 475 (46%) |
| Jobless person within the household | Presence of a jobless person                                            | 122 (12%) |
|                                     | Absence of a jobless person                                             | 841 (82%) |
|                                     | Do not want to answer                                                   | 60 (6%)   |
| Household annual income             | <3 million JPY                                                          | 275 (27%) |
|                                     | 3 to <6 million JPY                                                     | 314 (31%) |
|                                     | ≥6 million JPY                                                          | 242 (24%) |
|                                     | Do not want to answer                                                   | 192 (19%) |
| Social activities                   | Participated                                                            | 188 (18%) |
|                                     | Not participated                                                        | 835 (82%) |
| Trust of information                | National newspapers, TVs, and radios                                    | 302 (30%) |
|                                     | Local newspapers, TVs, and radios                                       | 380 (37%) |
|                                     | Magazines                                                               | 49 (5%)   |
|                                     | Central government                                                      | 163 (16%) |
|                                     | International organization                                              | 172 (17%) |
|                                     | Local municipality                                                      | 218 (21%) |
|                                     | Explanatory meetings of central government and prefecture               | 90 (9%)   |
|                                     | Direct information from medical professionals                           | 197 (19%) |
|                                     | Direct information from experts                                         | 180 (18%) |
|                                     | Books written by experts                                                | 94 (9%)   |
|                                     | Direct information from family and friends in Fukushima prefecture      | 64 (6%)   |
|                                     | Direct information from family and friends outside Fukushima prefecture | 24 (2%)   |
|                                     | On-line information from experts                                        | 149 (15%) |
|                                     | On-line information from other                                          | 58 (6%)   |
|                                     | Do not trust either above                                               | 309 (30%) |
| Advisors or counselors              | Presence of advisors or counselors                                      | 676 (66%) |
|                                     | Absence of advisors or counselors                                       | 347 (34%) |
| Life events within a year           | Presence of life events                                                 | 635 (62%) |
|                                     | Absence of life events                                                  | 388 (38%) |

a: full-time non-management; management; company executives and managers; dispatch and contract employees; civil servants and non-profit organization employees; teachers and lecturers; health professionals; and other professionals.

b: part-time, casual, and sideline workers; home duties; students; jobless, retired, etc.

c: “Science course” and “science course chosen from between science course and humanities course”.

d: “Humanities course” and “humanities course chosen from between science course and humanities course”.

**Table S5. Distributions of each outcome.**

|                                | Score |     |     |     |     |     |     |     |     |    |    |
|--------------------------------|-------|-----|-----|-----|-----|-----|-----|-----|-----|----|----|
|                                | 0     | 1   | 2   | 3   | 4   | 5   | 6   | 7   | 8   | 9  | 10 |
| SWL                            | 3%    | 1%  | 4%  | 8%  | 5%  | 18% | 14% | 21% | 18% | 4% | 3% |
| Enjoyment                      | 46%   | 54% | -   | -   | -   | -   | -   | -   | -   | -  | -  |
| Happiness                      | 44%   | 56% | -   | -   | -   | -   | -   | -   | -   | -  | -  |
| Laughter                       | 19%   | 81% | -   | -   | -   | -   | -   | -   | -   | -  | -  |
| Stress                         | 26%   | 74% | -   | -   | -   | -   | -   | -   | -   | -  | -  |
| Sadness                        | 70%   | 30% | -   | -   | -   | -   | -   | -   | -   | -  | -  |
| Worry                          | 41%   | 59% | -   | -   | -   | -   | -   | -   | -   | -  | -  |
| SH                             | -     | 2%  | 18% | 50% | 24% | 6%  | -   | -   | -   | -  | -  |
| Improvement of SH              | -     | 6%  | 26% | 60% | 7%  | 2%  | -   | -   | -   | -  | -  |
| Radiation anxiety              | -     | 14% | 40% | 35% | 12% | -   | -   | -   | -   | -  | -  |
| Reduction of radiation anxiety | -     | 7%  | 17% | 40% | 28% | 8%  | -   | -   | -   | -  | -  |
| Acceptance of radiation risk   | 48%   | 52% | -   | -   | -   | -   | -   | -   | -   | -  | -  |

SWL: satisfaction with life; SH: self-rated health.

**Table S6.** Spearman's correlation matrix among outcomes.

|                                      | Enjoyment   | Happiness   | Laughter    | Stress       | Sadness      | Worry        | SH           | Improvements<br>in SH | Radiation<br>anxiety | Reduction<br>in radiation<br>anxiety | Acceptance<br>of radiation<br>risk |
|--------------------------------------|-------------|-------------|-------------|--------------|--------------|--------------|--------------|-----------------------|----------------------|--------------------------------------|------------------------------------|
| SWL                                  | 0.37<br>*** | 0.43<br>*** | 0.26<br>*** | -0.14<br>*** | -0.14<br>*** | -0.23<br>*** | 0.44<br>***  | 0.32<br>***           | -0.13<br>***         | 0.15<br>***                          | 0.15<br>***                        |
| Enjoyment                            | -           | 0.74<br>*** | 0.43<br>*** | 0.00<br>ns   | 0.00<br>ns   | -0.05<br>ns  | 0.29<br>***  | 0.23<br>***           | 0.01<br>ns           | 0.04<br>ns                           | 0.06<br>ns                         |
| Happiness                            | -           | -           | 0.37<br>*** | 0.01<br>ns   | -0.04<br>ns  | -0.03<br>ns  | 0.31<br>***  | 0.22<br>***           | 0.02<br>ns           | 0.02<br>ns                           | 0.04<br>ns                         |
| Laughter                             | -           | -           | -           | 0.04<br>ns   | -0.10<br>**  | -0.03<br>ns  | 0.23<br>***  | 0.17<br>***           | -0.03<br>ns          | 0.04<br>ns                           | 0.07<br>*                          |
| Stress                               | -           | -           | -           | -            | 0.28<br>***  | 0.46<br>***  | -0.13<br>*** | -0.15<br>***          | 0.10<br>**           | -0.01<br>ns                          | 0.01<br>ns                         |
| Sadness                              | -           | -           | -           | -            | -            | 0.41<br>***  | -0.16<br>*** | -0.11<br>***          | 0.11<br>***          | -0.03<br>ns                          | -0.01<br>ns                        |
| Worry                                | -           | -           | -           | -            | -            | -            | -0.19<br>*** | -0.20<br>***          | 0.12<br>***          | -0.03<br>ns                          | -0.01<br>ns                        |
| SH                                   | -           | -           | -           | -            | -            | -            | -            | 0.55<br>***           | -0.22<br>***         | 0.23<br>***                          | 0.16<br>***                        |
| Improvements<br>in SH                | -           | -           | -           | -            | -            | -            | -            | -                     | -0.25<br>***         | 0.21<br>***                          | 0.11<br>***                        |
| Radiation<br>anxiety                 | -           | -           | -           | -            | -            | -            | -            | -                     | -                    | -0.39<br>***                         | -0.34<br>***                       |
| Reduction in<br>radiation<br>anxiety | -           | -           | -           | -            | -            | -            | -            | -                     | -                    | -                                    | 0.21<br>***                        |

SWL: satisfaction with life; SH: self-rated health. ns: not significant; \*:  $P < 0.05$ ; \*\*:  $P < 0.01$ ; \*\*\*:  $P < 0.001$ .

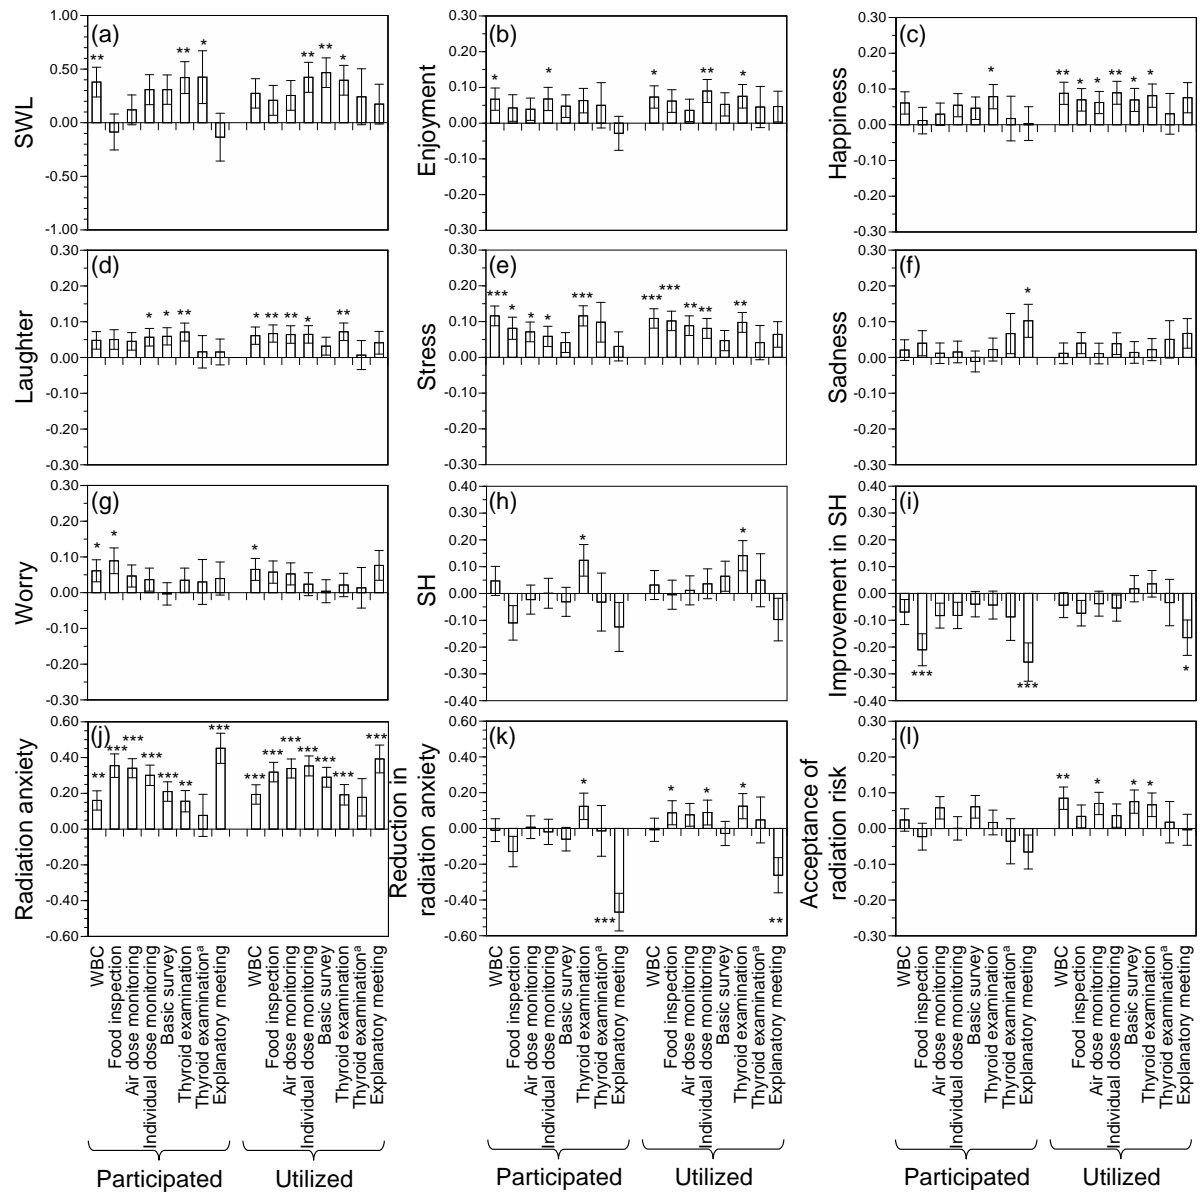

**Figure S1.** Differences in outcomes according to participation in/utilization of radiological measures before propensity score matching. The values represent differences in outcomes between “participated” and “did not participate” or between “utilized” and “did not utilize.” The Mann-Whitney U test was used to test differences in outcomes according to participation in/utilization of radiological countermeasures. (a) SWL; (b) Enjoyment; (c) Happiness; (d) Laughter; (e) Stress; (f) Sadness; (g) Worry; (h) SH; (i) Improvement in SH; (j) Radiation anxiety; (k) Reduction in radiation anxiety; (l) Acceptance of radiation risk. Participated: respondents and/or their family participated. WBC: whole body counter; SWL: satisfaction with life; SH: self-rated health. Error bar represents standard error. \*:  $P < 0.05$ ; \*\*:  $P < 0.01$ ; \*\*\*:  $P < 0.001$ . <sup>a</sup>: Respondents or their family members are subjects of examination..
